# Supplementary material for: Spatiotemporal distribution and molecular characterization of circulating dengue virus serotypes/genotypes in Senegal from 2019 to 2023
Source: Preprints.org preprint supplement (doi:10.20944/preprints202310.0233.v1), 2023-10-05
Supplement: Supplementary file 3 [file supplementary]

Article

Spatiotemporal distribution and molecular characterization of circulating DENV serotypes/genotypes in Senegal from 2019 to 2023

Idrissa Dieng1*, Cheikh Talla2, Mamadou Aliou Barry2, Aboubacry Gaye2, Diamilatou Balde1, Miniane Ndiaye, Mohamed Kane1, Samba Niang Sagne2, Moussa Moise Diagne, Boly Diop, Boubacar Diallo, Amadou Alpha Sall1, Ousmane Faye1, Abdou Rahman Sow, Gamou Fall1, Cheikh Loucoubar2+ and Oumar Faye1+

1 Arboviruses and Haemorrhagic Fever Viruses Unit, Virology Department, Institut Pasteur de Dakar, Dakar 220, Senegal

2 Epidemiology, Clinical Research and Data Science Department, Institut Pasteur de Dakar, Dakar 220, Senegal

3 EMBL’s European Bioinformatics Institute

4 Department of Animal Biology, Faculty of Science et Technics, Université Cheikh Anta Diop de Da-kar (UCAD), BP 5005 Fann , Dakar, Senegal

***** Correspondence: Idrissa.dieng@pasteur.sn; Tel.: +221 76 191 24 47

+ Authors contributes equally

**Table S1:** Number of DENV positives samples recorded per regions from 2019 to 2023 through the 4S network.

| Region | Number of DENV positive samples |
| --- | --- |
| Dakar | 60 |
| Diourbel | 06 |
| Fatick | 08 |
| Kaffrine | 29 |
| Kaolack | 16 |
| Kedougou | 01 |
| Kolda | 01 |
| Louga | 06 |
| Matam | 166 |
| Saint-Louis | 64 |
| Tambacounda | 05 |
| Thies | 39 |
| Ziguinchor | 01 |

**Table S2 :** Summary of the number of serotyped samples at each monitoring region

| Region | DENV-1 | DENV-2 | DENV-3 |
| --- | --- | --- | --- |
| Dakar | 04 | 00 | 44 |
| Thies | 01 | 01 | 32 |
| Fatick | 00 | 00 | 04 |
| Diourbel | 00 | 00 | 04 |
| Kaolack | 00 | 01 | 13 |
| Kaffrine | 01 | 02 | 20 |
| Saint Louis | 53 | 00 | 03 |
| Louga | 03 | 00 | 03 |
| Tambacounda | 00 | 00 | 02 |
| Matam | 04 | 00 | 151 |
| Total | 66 | 04 | 276 |

**Table S3:** Reparation of detected DENV RNA positive samples per Year_Week from 2019 to 2023

| Year-Week | Number of Cases |
| --- | --- |
| 2019-02 | 1 |
| 2019-04 | 2 |
| 2019-33 | 1 |
| 2019-39 | 1 |
| 2019-42 | 2 |
| 2019-43 | 2 |
| 2019-44 | 2 |
| 2019-45 | 3 |
| 2019-46 | 1 |
| 2019-47 | 2 |
| 2019-49 | 1 |
| 2019-50 | 1 |
| 2020-01 | 1 |
| 2020-28 | 1 |
| 2020-38 | 1 |
| 2020-40 | 1 |
| 2020-41 | 1 |
| 2020-42 | 1 |
| 2020-43 | 3 |
| 2020-44 | 3 |
| 2020-45 | 1 |
| 2020-46 | 3 |
| 2020-47 | 2 |
| 2020-48 | 1 |
| 2020-49 | 1 |
| 2021-04 | 1 |
| 2021-05 | 1 |
| 2021-36 | 1 |
| 2021-39 | 7 |
| 2021-40 | 7 |
| 2021-41 | 16 |
| 2021-42 | 8 |
| 2021-43 | 21 |
| 2021-44 | 18 |
| 2021-45 | 11 |
| 2021-46 | 7 |
| 2021-47 | 11 |
| 2021-48 | 5 |
| 2021-49 | 3 |
| 2021-50 | 3 |
| 2021-51 | 10 |
| 2021-52 | 1 |
| 2022-01 | 4 |
| 2022-02 | 1 |
| 2022-03 | 3 |
| 2022-04 | 9 |
| 2022-05 | 5 |
| 2022-06 | 2 |
| 2022-07 | 6 |
| 2022-08 | 6 |
| 2022-11 | 2 |
| 2022-12 | 5 |
| 2022-13 | 4 |
| 2022-14 | 1 |
| 2022-16 | 1 |
| 2022-34 | 1 |
| 2022-35 | 1 |
| 2022-36 | 2 |
| 2022-39 | 2 |
| 2022-40 | 3 |
| 2022-41 | 4 |
| 2022-42 | 5 |
| 2022-43 | 9 |
| 2022-44 | 9 |
| 2022-45 | 13 |
| 2022-46 | 17 |
| 2022-47 | 20 |
| 2022-48 | 22 |
| 2022-49 | 20 |
| 2022-50 | 14 |
| 2022-51 | 18 |
| 2022-52 | 7 |
| 2023-01 | 2 |
| 2023-02 | 4 |
| 2023-03 | 2 |
| 2023-04 | 2 |
| 2023-05 | 2 |
| 2023-06 | 2 |
| 2023-07 | 1 |

**Table S4:** Reparation of detected DENV serotypes per Year_Week from 2019 to 2023

| Years_Week | DENV-1 | DENV-2 | DENV-3 |
| --- | --- | --- | --- |
| 2019-02 | 1 | 0 | 0 |
| 2019-04 | 2 | 0 | 0 |
| 2019-33 | 0 | 1 | 0 |
| 2019-39 | 0 | 0 | 1 |
| 2019-42 | 2 | 0 | 0 |
| 2019-43 | 0 | 0 | 2 |
| 2019-44 | 0 | 0 | 1 |
| 2019-45 | 0 | 0 | 2 |
| 2019-46 | 0 | 0 | 0 |
| 2019-47 | 0 | 0 | 0 |
| 2019-49 | 0 | 0 | 0 |
| 2019-50 | 0 | 0 | 1 |
| 2020-01 | 0 | 1 | 0 |
| 2020-28 | 0 | 0 | 0 |
| 2020-38 | 0 | 1 | 0 |
| 2020-40 | 0 | 1 | 0 |
| 2020-41 | 0 | 0 | 1 |
| 2020-42 | 0 | 0 | 0 |
| 2020-43 | 0 | 0 | 0 |
| 2020-44 | 0 | 0 | 2 |
| 2020-45 | 0 | 0 | 0 |
| 2020-46 | 0 | 0 | 0 |
| 2020-47 | 0 | 0 | 0 |
| 2020-48 | 0 | 0 | 0 |
| 2020-49 | 0 | 0 | 0 |
| 2021-04 | 0 | 0 | 0 |
| 2021-05 | 0 | 0 | 0 |
| 2021-36 | 0 | 0 | 1 |
| 2021-39 | 7 | 0 | 0 |
| 2021-40 | 5 | 0 | 2 |
| 2021-41 | 11 | 0 | 1 |
| 2021-42 | 7 | 0 | 0 |
| 2021-43 | 14 | 0 | 6 |
| 2021-44 | 11 | 0 | 2 |
| 2021-45 | 1 | 0 | 9 |
| 2021-46 | 0 | 0 | 3 |
| 2021-47 | 1 | 0 | 7 |
| 2021-48 | 1 | 0 | 3 |
| 2021-49 | 1 | 0 | 2 |
| 2021-50 | 0 | 0 | 2 |
| 2021-51 | 1 | 0 | 8 |
| 2021-52 | 0 | 0 | 1 |
| 2022-01 | 0 | 0 | 4 |
| 2022-02 | 0 | 0 | 1 |
| 2022-03 | 1 | 0 | 2 |
| 2022-04 | 0 | 0 | 9 |
| 2022-05 | 0 | 0 | 3 |
| 2022-06 | 0 | 0 | 0 |
| 2022-07 | 0 | 0 | 5 |
| 2022-08 | 0 | 0 | 5 |
| 2022-11 | 0 | 0 | 2 |
| 2022-12 | 0 | 0 | 5 |
| 2022-13 | 0 | 0 | 4 |
| 2022-14 | 0 | 0 | 0 |
| 2022-16 | 0 | 0 | 0 |
| 2022-34 | 0 | 0 | 1 |
| 2022-35 | 0 | 0 | 1 |
| 2022-36 | 0 | 0 | 2 |
| 2022-39 | 0 | 0 | 2 |
| 2022-40 | 0 | 0 | 3 |
| 2022-41 | 0 | 0 | 4 |
| 2022-42 | 0 | 0 | 4 |
| 2022-43 | 0 | 0 | 8 |
| 2022-44 | 0 | 0 | 8 |
| 2022-45 | 0 | 0 | 13 |
| 2022-46 | 0 | 0 | 17 |
| 2022-47 | 0 | 0 | 20 |
| 2022-48 | 0 | 0 | 22 |
| 2022-49 | 0 | 0 | 20 |
| 2022-50 | 0 | 0 | 14 |
| 2022-51 | 0 | 0 | 18 |
| 2022-52 | 0 | 0 | 7 |
| 2023-01 | 0 | 0 | 2 |
| 2023-02 | 0 | 0 | 4 |
| 2023-03 | 0 | 0 | 2 |
| 2023-04 | 0 | 0 | 2 |
| 2023-05 | 0 | 0 | 2 |
| 2023-06 | 0 | 0 | 2 |
| 2023-07 | 0 | 0 | 1 |
